# Supplementary material for: Hematopoietic stem cell-derived fibrocytes as targets and tools for cancer therapy: mechanisms and therapeutic implications
Source: Research Square preprint supplement (doi:10.21203/rs.3.rs-1438771/v1), 2022-03-14
Supplement: Supplementary file 1 [file 50baad1a56c27dc482f79d82.xlsx]

## Sheet: Supplementary Table S2
Supplementary Table S2. Antibodies used in this study
Antibody	Company	Catalog Number	Species Reactivity		Dilu	tion
				FCM	IF	IHC	WB
FGFR2	Youdi Biotec	N/A	Human, Mouse			1:50
FITC‑conjugated FGFR2	Youdi Biotec	N/A	Human, Mouse	1:100	1:100
PE‑conjugated FGFR2	Youdi Biotec	N/A	Human, Mouse		1:100
PE‑conjugated CD14	Biolegend	123309	Mouse	1:100
PE‑conjugated CD16	BD Biosciences	553145	Mouse	1:100
PE‑conjugated CD90	Biolegend	105307	Mouse	1:100
PE‑conjugated CD105	Biolegend	120407	Mouse	1:100
PE‑conjugated CD34	BD Biosciences	551387	Mouse	1:100	1:100
PE‑conjugated CD34	Miltenyi Biotec	130-098-140	Human	1:100
PE‑conjugated CD45	Miltenyi Biotec	130-102-781	Mouse	1:100	1:100
PE‑conjugated CD45	Miltenyi Biotec	130-098-141	Human	1:100
PE‑conjugated Collagen I	Biorbyt	orb129075	Human, Mouse	1:200	1:200
Luciferase	abcam	ab187340	Exogenous cells			1:500
YAP	CST	14074	Human, Mouse		1:100		1:1000
phospho-YAP (Y357)	abcam	ab62751	Human				1:1000
phospho-YAP (S127)	CST	13008	Human, Mouse				1:1000
Fibronectin	ImmunoWay	YM3137	Human, Mouse		1:100
β-actin	abcam	ab6276	Human, Mouse				1:5000
