# Supplementary material for: Hematopoietic stem cell-derived fibrocytes as targets and tools for cancer therapy: mechanisms and therapeutic implications
Source: Research Square preprint supplement (doi:10.21203/rs.3.rs-1438771/v1), 2022-03-14
Supplement: Supplementary file 2 [file 63e137567982d1ba0c7f7e28.xlsx]

## Sheet: Supplementary Table S1
Supplementary Table S1. Recombinant proteins and neutralizing antibodies used in this study
Neutralizing Antibody/ Recombinant Protein	Company	Catalog Number	Species (Reactivity)		Concen	tration
				TAvivo	NAvivo	CAvitro	CAvivo
FGF2 recombinant protein	Novus Biologicals	NBP2-34921	Human	40-160 pg/100ul
FGF2 neutralizing antibody	Sigma-Aldrich	05-117	Human, Mouse		10-80 ng/100ul
CXCR4 neutralizing antibody	R&D	MAB172-100	Human			0.2-5 ug/ml	1-20 ug/100ul
CXCL12 recombinant protein	R&D	350-NS-010/CF	Human			0.01-1 ng/ml
TAvivo: In vivo treatment with recombinant protein.
NAvivo: In vivo neutralization assay.
CAvitro: In vitro chemotaxis assay.
CAvivo: In vivo chemotaxis assay.
