# Supplementary material for: Hematopoietic stem cell-derived fibrocytes as targets and tools for cancer therapy: mechanisms and therapeutic implications
Source: Research Square preprint supplement (doi:10.21203/rs.3.rs-1438771/v1), 2022-03-14
Supplement: Supplementary file 3 [file e48c1fed2b1ecf831625b62e.xlsx]

## Sheet: Supplementary Table S4
Supplementary Table S4. Primers used in this study
Target Gene	Sequence	(5'→ 3')	Amplicon Size
LSP1	Forward	TCCGTCCTGCAAGGATATTGT	101bp
	Reverse	ATGGGGTGCTCTTAATTGTTGAT
ITGAX	Forward	GGGATGCCGCCAAAATTCTC	115bp
	Reverse	ATTGCATAGCGGATGATGCCT
MRC1	Forward	TCCGGGTGCTGTTCTCCTA	211bp
	Reverse	CCAGTCTGTTTTTGATGGCACT
FCGR2A	Forward	GCTTCAACCATTGACAGTTTTGC	94bp
	Reverse	CCACGGGGGCTCAAGTTTC
SPN	Forward	GACCCCAGGTCTCTAGCGTAA	157bp
	Reverse	GCCACGAGGACTATGACCG
CXCR4	Forward	ACTACACCGAGGAAATGGGCT	133bp
	Reverse	CCCACAATGCCAGTTAAGAAGA
CCR5	Forward	GTTGGACCAAGCTATGCAGGT	142bp
	Reverse	GCAGAAGCGTTTGGCAATGT
PTPRC	Forward	ACCACAAGTTTACTAACGCAAGT	126bp
	Reverse	TTTGAGGGGGATTCCAGGTAAT
FN1	Forward	CGGTGGCTGTCAGTCAAAG	130bp
	Reverse	AAACCTCGGCTTCCTCCATAA
COL3A1	Forward	GCCAAATATGTGTCTGTGACTCA	145bp
	Reverse	GGGCGAGTAGGAGCAGTTG
COL4A1	Forward	GGGATGCTGTTGAAAGGTGAA	113bp
	Reverse	GGTGGTCCGGTAAATCCTGG
COL4A2	Forward	TTATGCACTGCCTAAAGAGGAGC	207bp
	Reverse	CCCTTAACTCCGTAGAAACCAAG
DCN	Forward	ATGAAGGCCACTATCATCCTCC	135bp
	Reverse	GTCGCGGTCATCAGGAACTT
ACTA2	Forward	GTGTTGCCCCTGAAGAGCAT	109bp
	Reverse	GCTGGGACATTGAAAGTCTCA
BGN	Forward	GAGACCCTGAATGAACTCCACC	131bp
	Reverse	CTCCCGTTCTCGATCATCCTG
TNC	Forward	TCCCAGTGTTCGGTGGATCT	131bp
	Reverse	TTGATGCGATGTGTGAAGACA
WNT5A	Forward	GCCAGTATCAATTCCGACATCG	114bp
	Reverse	TCACCGCGTATGTGAAGGC
IGFBP2	Forward	GACAATGGCGATGACCACTCA	123bp
	Reverse	CAGCTCCTTCATACCCGACTT
WNT2	Forward	GCCTTTGTTTATGCCATCTCCT	114bp
	Reverse	CTTGGCGCTTCCCATCTTCTT
WISP1	Forward	GTGCTGTAAGATGTGCGCTCA	121bp
	Reverse	CACTCCTATTGCGTACCTCGG
PKP2	Forward	GTGGGCAACGGAAATCTTCAC	128bp
	Reverse	CCAGCCTTTAGCATGTCATAGG
MMP10	Forward	TGCTCTGCCTATCCTCTGAGT	103bp
	Reverse	TCACATCCTTTTCGAGGTTGTAG
FZD9	Forward	TGCGAGAACCCCGAGAAGT	88bp
	Reverse	GGGACCAGAACACCTCGAC
CXCL14	Forward	CGCTACAGCGACGTGAAGAA	171bp
	Reverse	GTTCCAGGCGTTGTACCAC
FGF2	Forward	AGTGTGTGCTAACCGTTACCT	170bp
	Reverse	ACTGCCCAGTTCGTTTCAGTG
YAP	Forward	TAGCCCTGCGTAGCCAGTTA	177bp
	Reverse	TCATGCTTAGTCCACTGTCTGT
TEAD1	Forward	ATGGAAAGGATGAGTGACTCTGC	118bp
	Reverse	TCCCACATGGTGGATAGATAGC
TEAD2	Forward	CTTCGTGGAACCGCCAGAT	152bp
	Reverse	GGAGGCCACCCTTTTTCTCA
TEAD3	Forward	TGGACCCTCTCAGGACATCAA	92bp
	Reverse	CCAGGGGCTCATAACTGCTG
TEAD4	Forward	GAACGGGGACCCTCCAATG	198bp
	Reverse	GCGAGCATACTCTGTCTCAAC
GALNT2	Forward	CGCCTGAGCAGAGAAGGTC	118bp
	Reverse	TCGTACTTCCCCAGTTCTTCAAA
FBLN5	Forward	CTCACTGTTACCATTCTGGCTC	89bp
	Reverse	GACTGGCGATCCAGGTCAAAG
SERPINE2	Forward	TGGTGATGAGATACGGCGTAA	101bp
	Reverse	GTTAGCCACTGTCACAATGTCTT
β-actin	Forward	CATCCACGAAACTACCTTCAACTCC	213bp
	Reverse	GAGCCGCCGATCCACACG
