# Supplementary figures and images for: Hematopoietic stem cell-derived fibrocytes as targets and tools for cancer therapy: mechanisms and therapeutic implications
Source: Research Square preprint supplement (doi:10.21203/rs.3.rs-1438771/v1), 2022-03-14

A

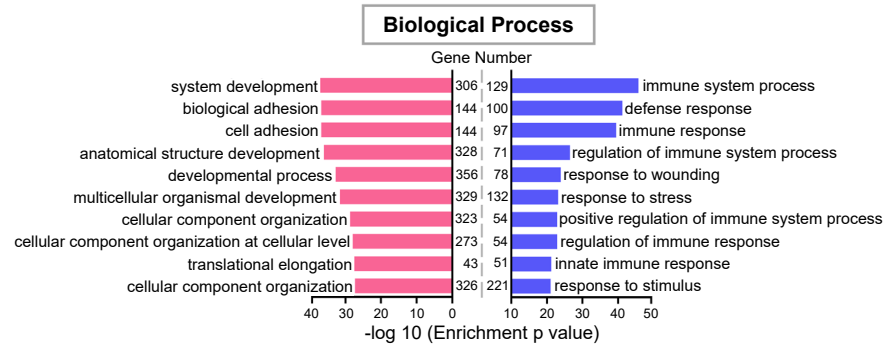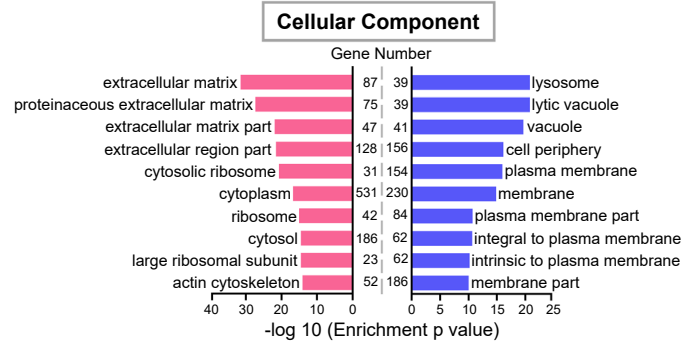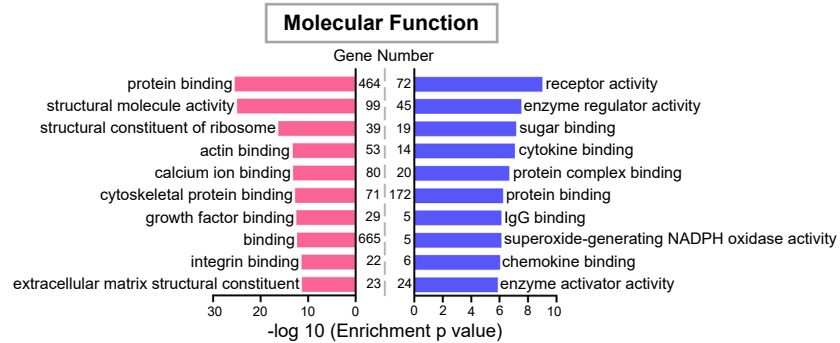

B

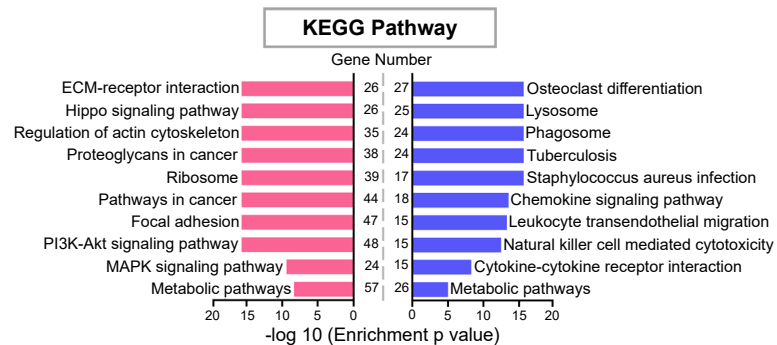

Supplement: Supplementary file 1 [file 2ec9609356ddec468e8c0856.pdf]
